# Supplementary material for: The effect of Nullomer-derived peptides 9R, 9S1R and 124R on the NCI-60 panel and normal cell lines
Source: Springer Nature journal article supplement (doi:10.1186/s12885-017-3514-z), 2017-08-09
Supplement: MOESM1 [file 13448710]

“Suppl. Results 1”

A. Kidney Cancer Cell Lines: 786-0, CAKI-1, SN12C, RFX 393, TK-10, A 498, UO-31 and ACNH

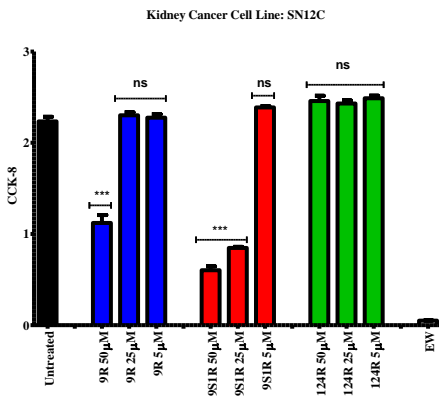

SN12C

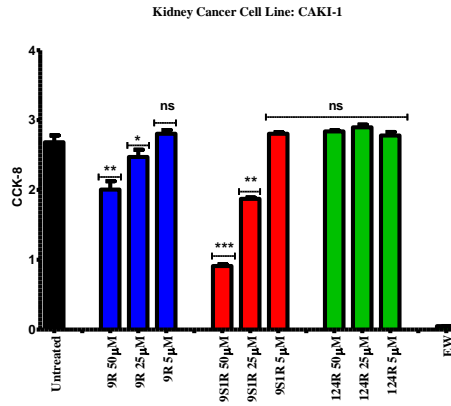

CAKI-1

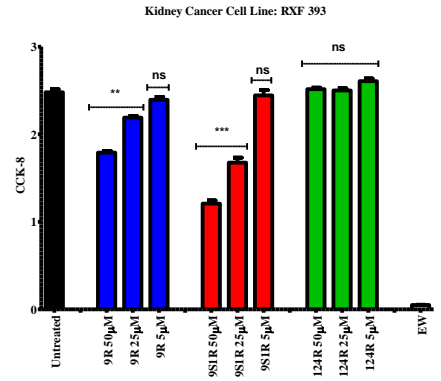

RFX 393

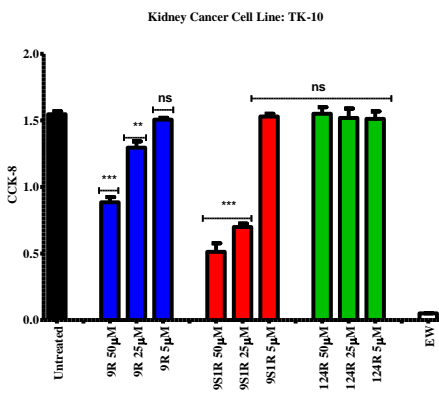

TK-10

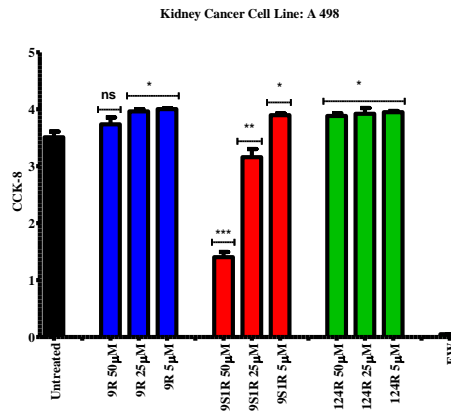

A 498

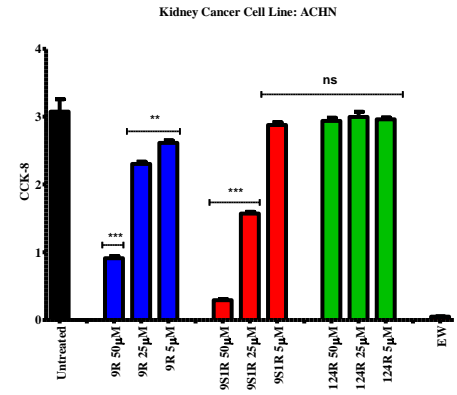

ACNH

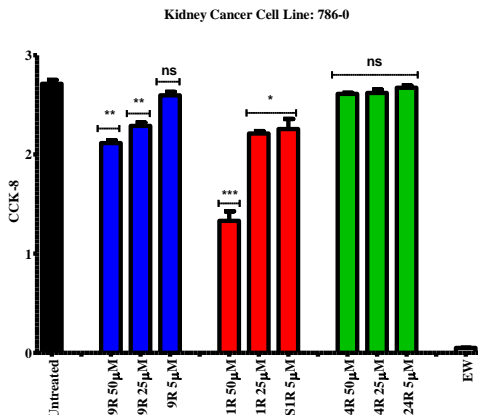

786-0

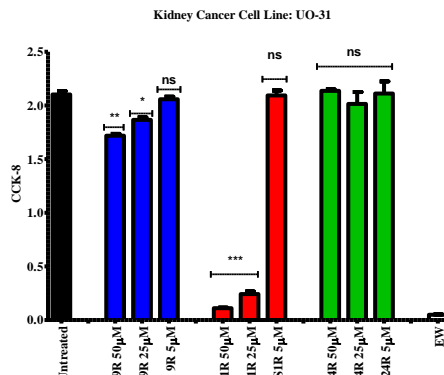

UO-31

## B. Prostate Cancer Cell Lines: PC-3, DU-145

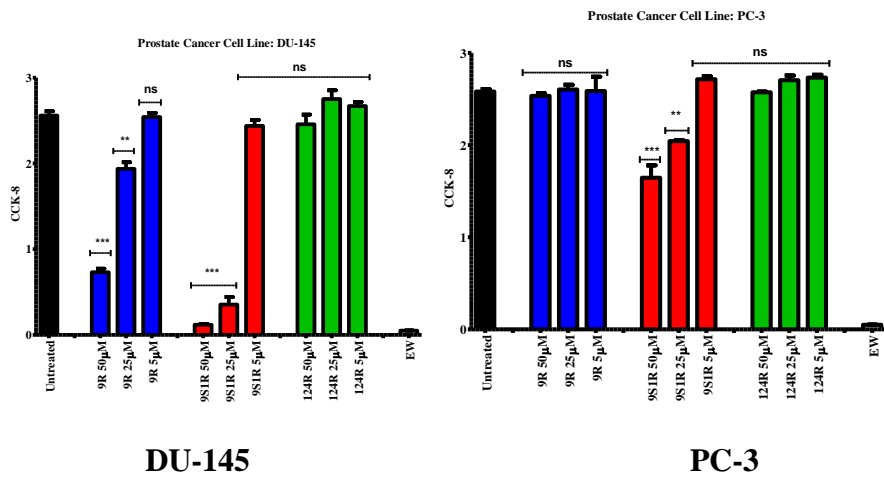

## C. Ovarian Cancer Cell Lines: OVCAR-8, NCI/ADR-RES, SK-OV-3, OVCAR-3, OVCAR-4, OVCAR-5 and IGR-OV1

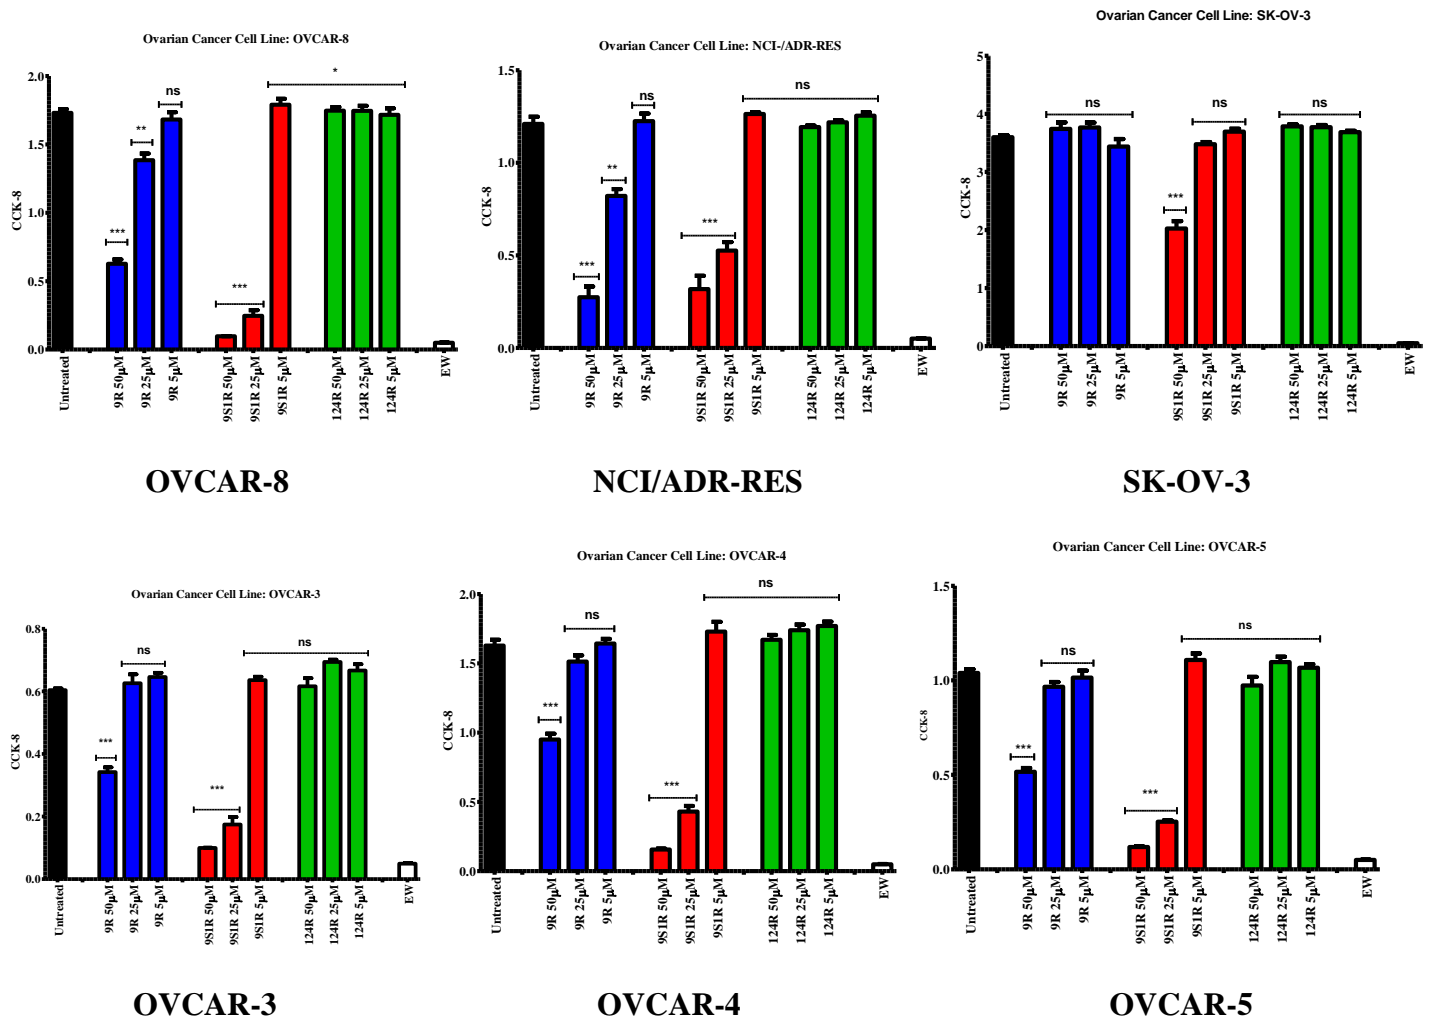

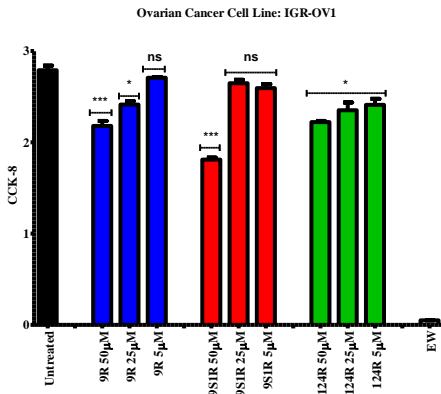

**IGR-OV1**

**D. Leukemia Lymphoma Cell Lines: K-562, SR, CCRF-CEM, RPMI 8226, HL-60 (TB) and MOLT-4**

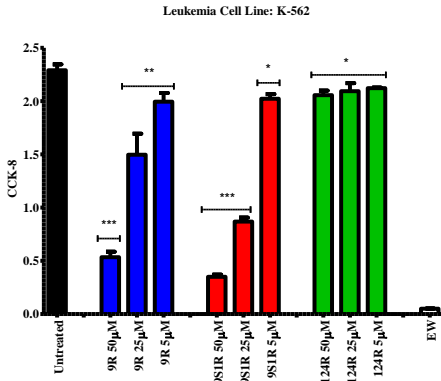

**K-562**

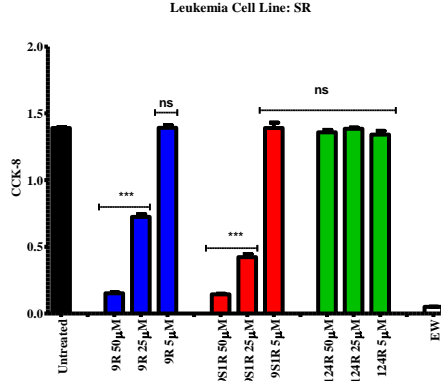

**SR**

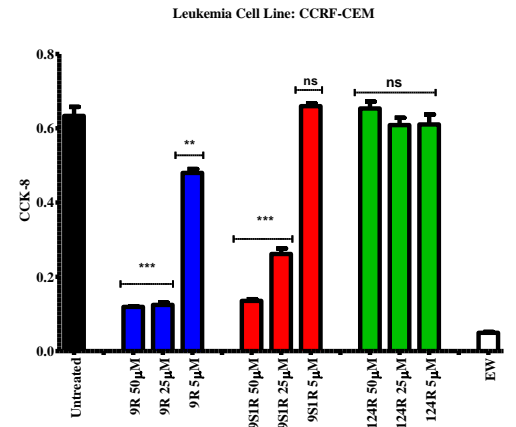

**CCRF-CEM**

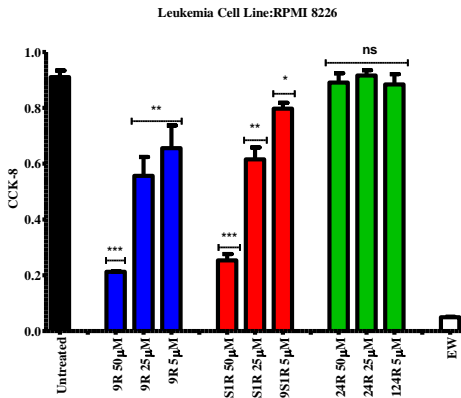

**RPMI 8226**

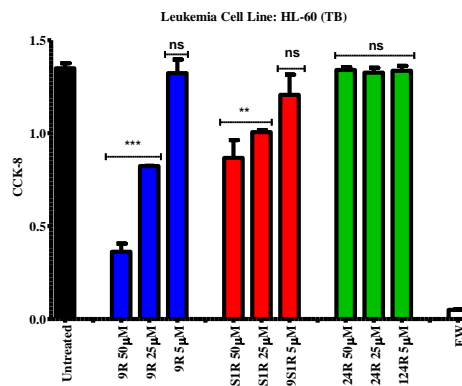

**HL-60 (TB)**

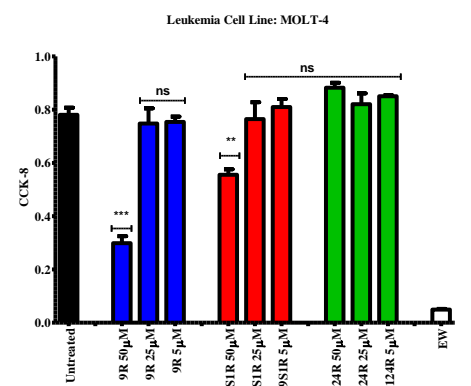

**MOLT-4**

# E. Colon Cancer Cell Lines: KM12, HCC 2998, SW-620, HT-29, HCT-15, HCT-116 and COLO 205

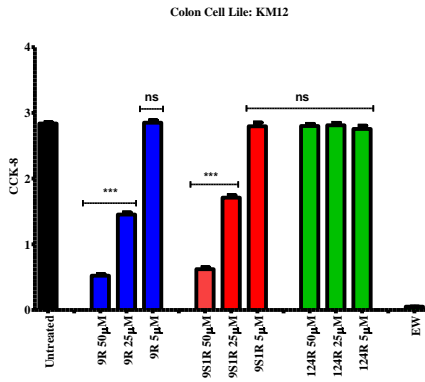

**KM12**

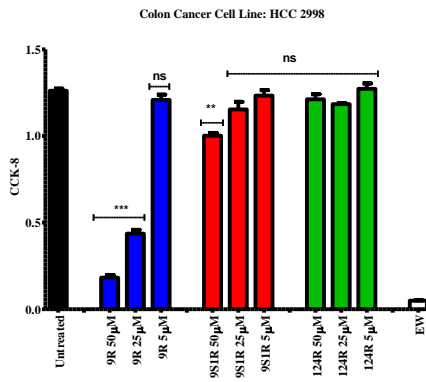

**HCC 2998**

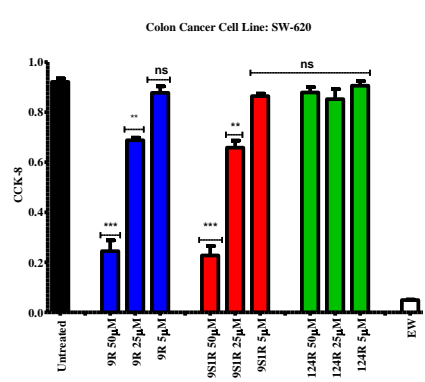

**SW-620**

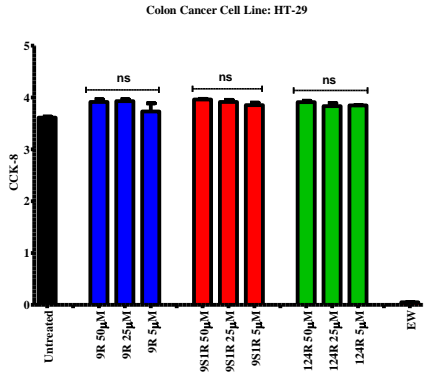

**HT-29**

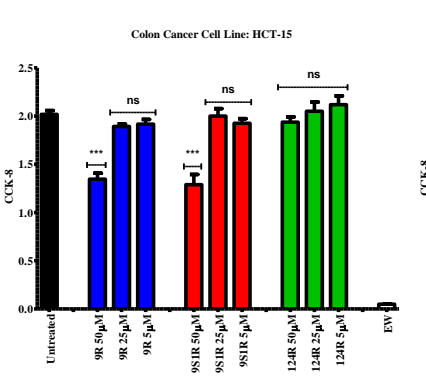

**HCT-15**

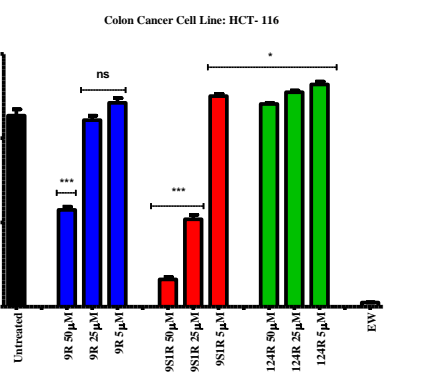

**HCT-116**

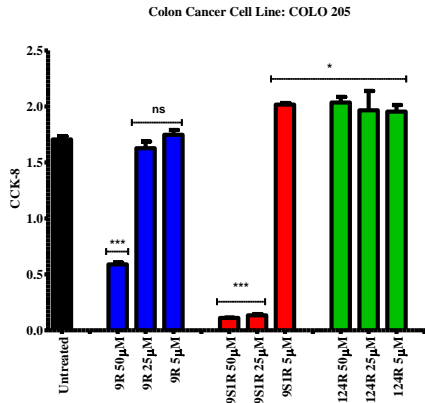

**COLO 205**

**F. Melanoma Cell Lines: UACC-62, SK-MEL-2, SK-MEL-28, M14, LOX-IMVI, UACC-257, SK-MEL-5, MDA-MB-435 and MALME-3M**

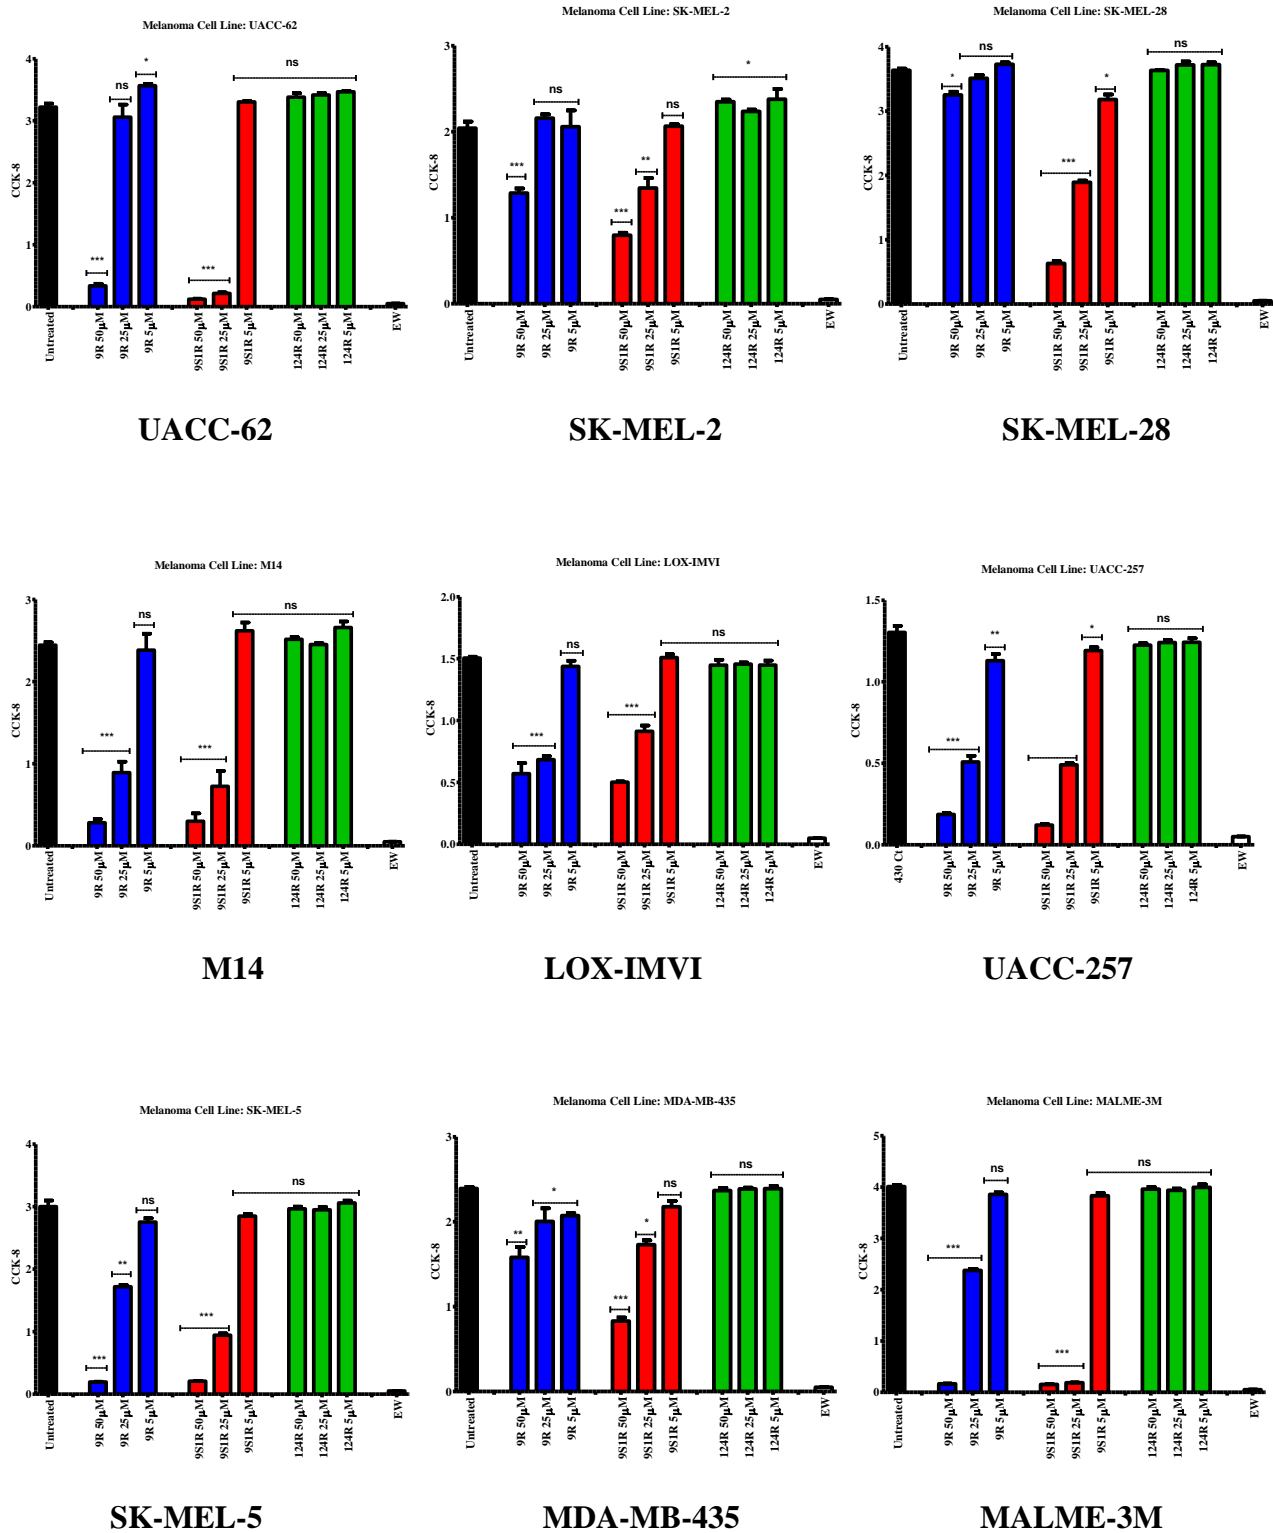

## G. Breast Cancer Cell Lines: T-47D, BT-549, HS-578T, MDA-MB-468, MDA-MB-231 and MCF-7

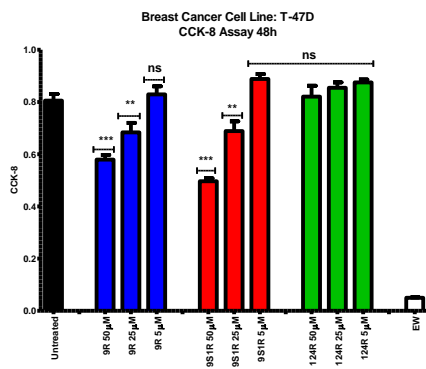

T-47D

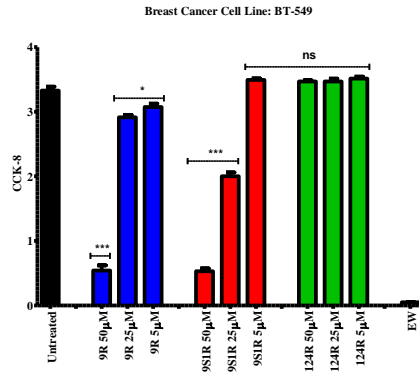

BT-549

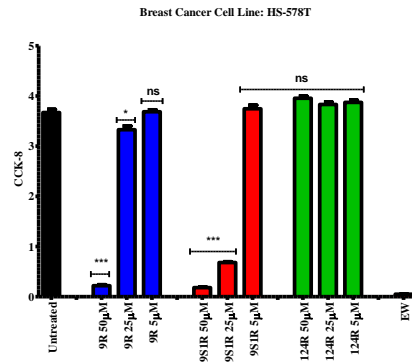

HS-578T

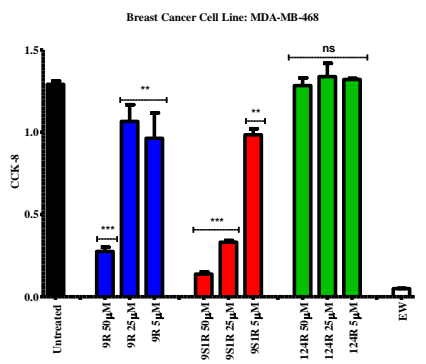

MDA-MB-468

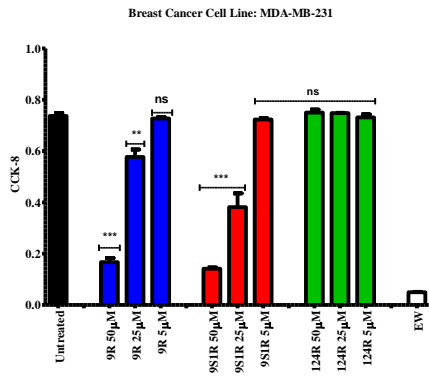

MDA-MB-231

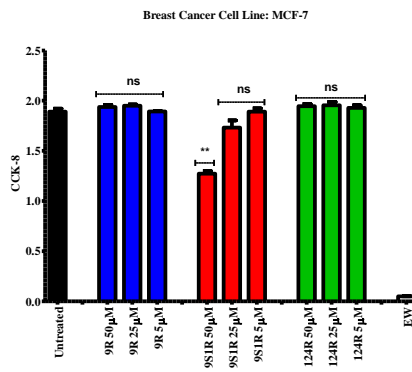

MCF-7

## H. CNS Cancer Cell Lines: U251, SNB-75, SNB-19, SF-539, SF-295 and SF-268

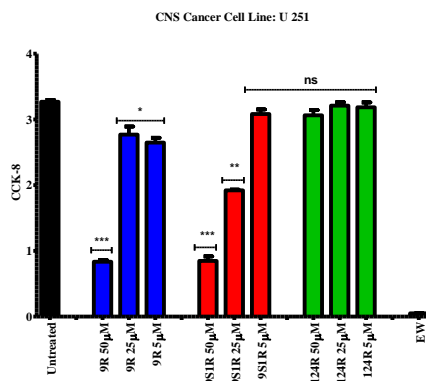

U251

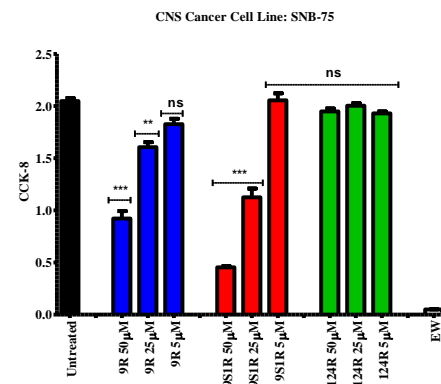

SNB-75

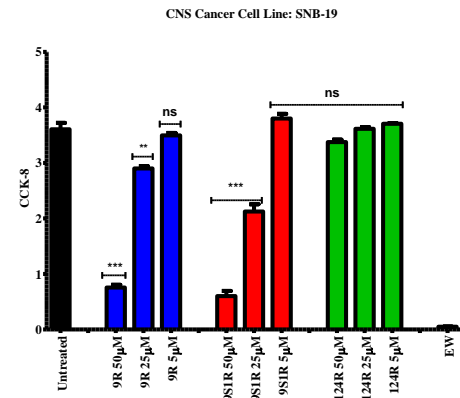

SNB-19

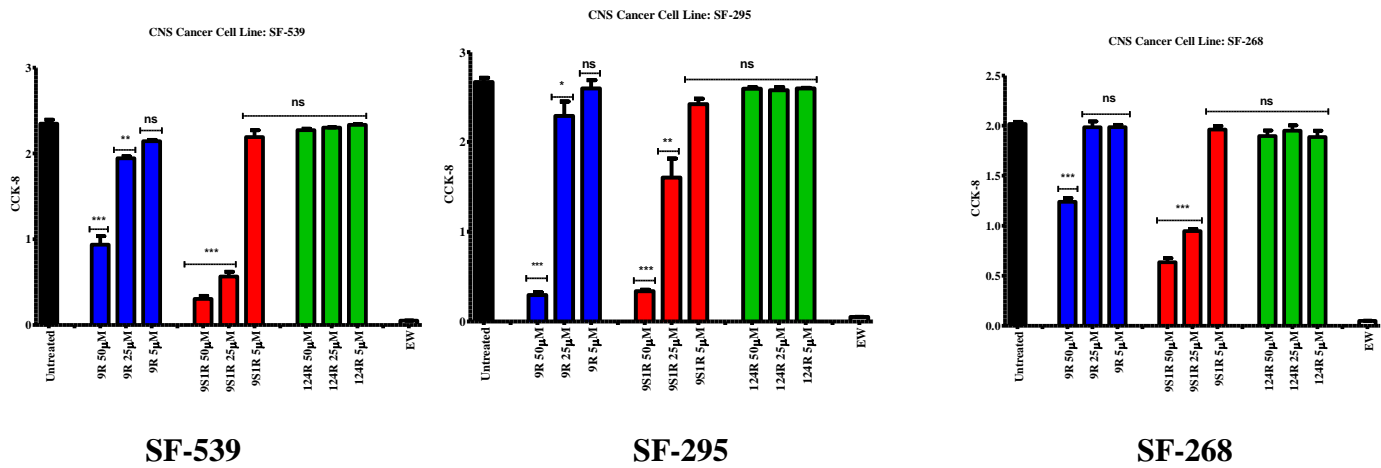

**I. Lung Cancer Cell Lines: NCI-H23, NC-H226, NCH-H522, A549 ATCC, EK VX, NCI-H460, HOP 62, HOP 92 and NCI-H322M**

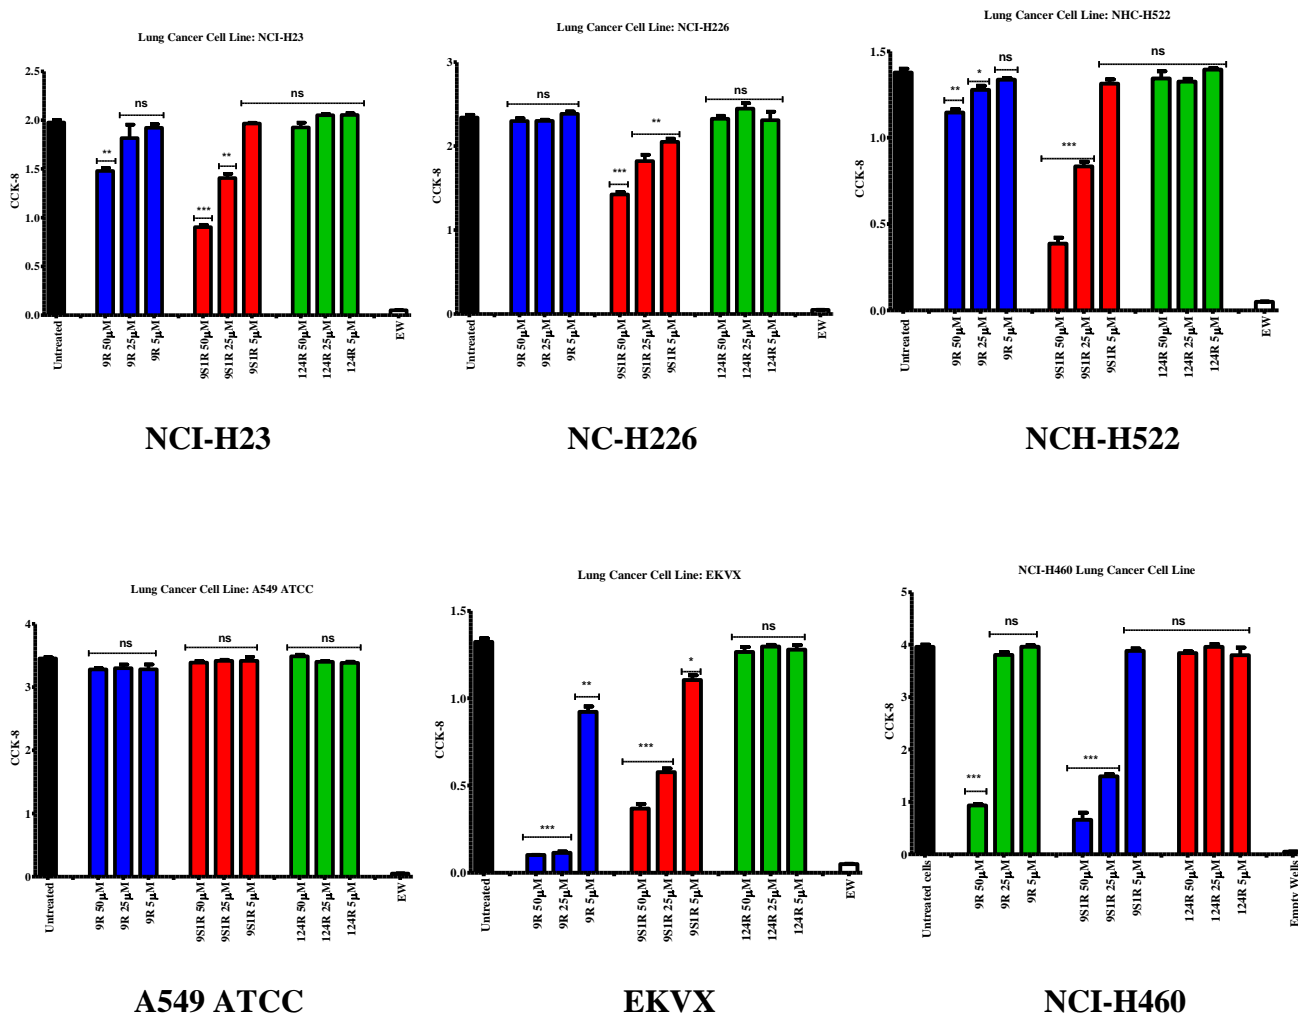

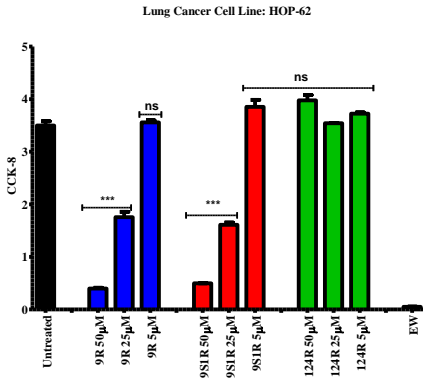

HOP 62

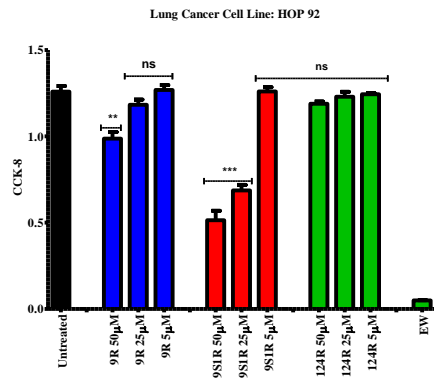

HOP 92

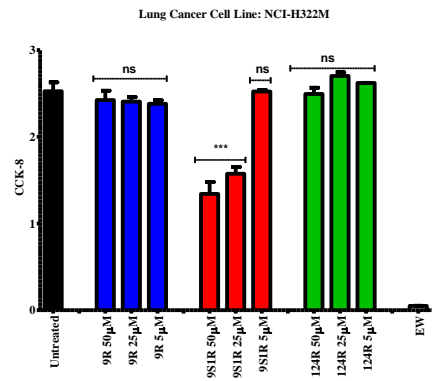

NCI-H322M
