# Supplementary material for: The effect of Nullomer-derived peptides 9R, 9S1R and 124R on the NCI-60 panel and normal cell lines
Source: Springer Nature journal article supplement (doi:10.1186/s12885-017-3514-z), 2017-08-09
Supplement: MOESM4 [file 13448710]

“Suppl. Results 2”

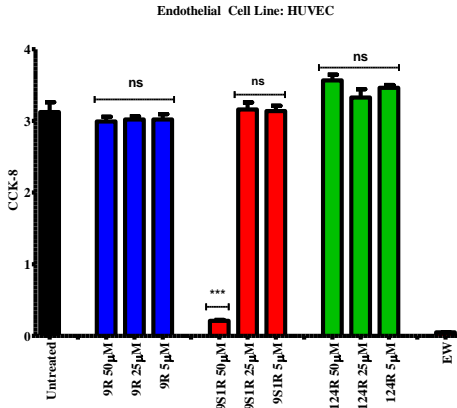

(A) HUVEC

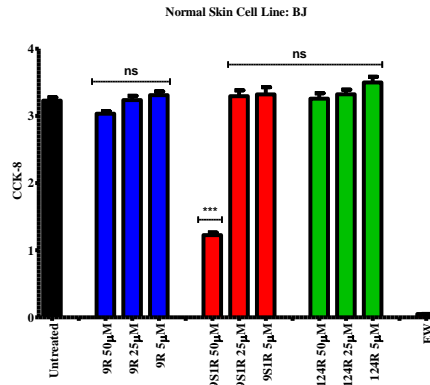

(B) BJ

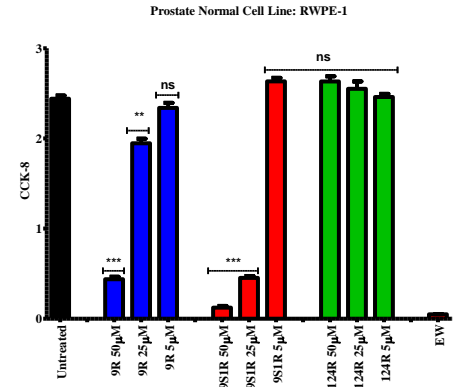

(C) RPEW-1

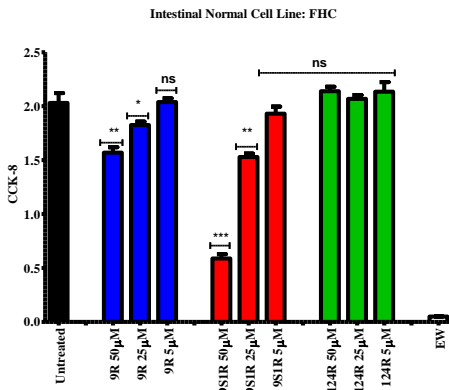

(D) FHC
