# Supplementary material for: The effect of Nullomer-derived peptides 9R, 9S1R and 124R on the NCI-60 panel and normal cell lines
Source: BMC Cancer. 2017 Aug 9;17:533. doi: 10.1186/s12885-017-3514-z (PMC5551024; doi:10.1186/s12885-017-3514-z)
Supplement: Supplementary file 3 — Spectrum activity of peptides 9R, 9S1R and 124R and current anticancer drugs (reference [9]). Comparison of Nullomer derived peptides (9R and 9S1R) sensitivity with current anticancer drugs approved by the FDA. (XLSX 13 kb) [file 12885_2017_3514_MOESM3_ESM.xlsx]

## Sheet: Sheet1
		"Suppl. Table 2" Activity Spectrum of Nullomer Derived Peptides 9R, 9S1R and Current Anti Cancer Drugs (Ref 9)
			Kidney	Prostate	Ovarian	Leukemia	Colon	Skin	Breast	CNS	Lung
	Type	Drug	Cancer	Cancer	Cancer	Lymphoma	Cancer	Melanoma	Cancer	Cancer	Cancer
	Peptides	9R in vitro	Sensitive	Sensitive	Sensitive	Sensitive	Sensitive	Sensitive	Sensitive	Sensitive	Sensitive
		9S1R in vitro	Sensitive	Sensitive	Sensitive	Sensitive	Sensitive	Sensitive	Sensitive	Sensitive	Sensitive
	Alkylating Agents	ThioTEPA			Sensitive				Sensitive
		Melphalan			Sensitive	Sensitive		Sensitive
		Chlorambucil				Sensitive
		Ifosfamide			Sensitive	Sensitive			Sensitive		Sensitive
		Carmustine				Sensitive				Sensitive
		Dacarbazine				Sensitive		Sensitive
		Temozolomide						Sensitive		Sensitive
	Platinum Analogs	Cisplatin			Sensitive	Sensitive
		Carboplatin			Sensitive				Sensitive	Sensitive	Sensitive
		Oxaliplatin					Sensitive
		Satraplatin		Sensitive
	Antimetabolites	Methotrexate				Sensitive			Sensitive	Sensitive
		Pemetrexete									Sensitive
		5-Fluorouracil					Sensitive		Sensitive
		Capecitabine					Sensitive		Sensitive
		Cytarabine				Sensitive
		Gemcitabine			Sensitive	Sensitive			Sensitive		Sensitive
		6-Mercaptopurine				Sensitive
		6-Thioguanine				Sensitive
		Fludarabine				Sensitive
		Clofarabine				Sensitive
	Topoisomerase	Irinotecan					Sensitive				Sensitive
	Interacting Agents	Topotecan			Sensitive	Sensitive					Sensitive
		Doxorubicin	Sensitive	Sensitive	Sensitive	Sensitive			Sensitive		Sensitive
		Epirubicin			Sensitive	Sensitive			Sensitive
		Idarubicin				Sensitive
		Mitoxantrone		Sensitive		Sensitive			Sensitive
		Dactinomycine	Sensitive
		Etoposide			Sensitive	Sensitive					Sensitive
		Teniposide				Sensitive				Sensitive
	Antimicrotubule	Paclitaxel			Sensitive				Sensitive		Sensitive
		Docetaxel		Sensitive	Sensitive				Sensitive		Sensitive
		Cabazitaxel		Sensitive
		Ixabepilone							Sensitive
		Vincristine				Sensitive
		Vinblastine	Sensitive	Sensitive		Sensitive
		Vinorelbine			Sensitive				Sensitive		Sensitive
		Estamustine		Sensitive
	HDIs	Panobinostat				Sensitive
		Valproic Acid		Sensitive
		Entinostat							Sensitive		Sensitive
		SB 939		Sensitive
	Proteasome Ihibitors	Velcade				Sensitive
		PR-171	Sensitive		Sensitive	Sensitive					Sensitive
	PARP-1 Inhibotors	Olaparib		Sensitive	Sensitive				Sensitive
		Iniparib							Sensitive
		AG014699						Sensitive
	Miscellaneous Agents	Temsirolimus	Sensitive
		Everolimus	Sensitive
		L-Asparaginase				Sensitive
		Bleomycine				Sensitive
		Procarbazine				Sensitive
	Cytokines	Interferon				Sensitive		Sensitive
		Interleukin-2	Sensitive					Sensitive
		Interleukin-12	Sensitive					Sensitive
